# Supplementary material
Source: MDPI journal article supplement (https://www.mdpi.com/2073-4441/14/8/1216)
Supplement: s1 [file s1]

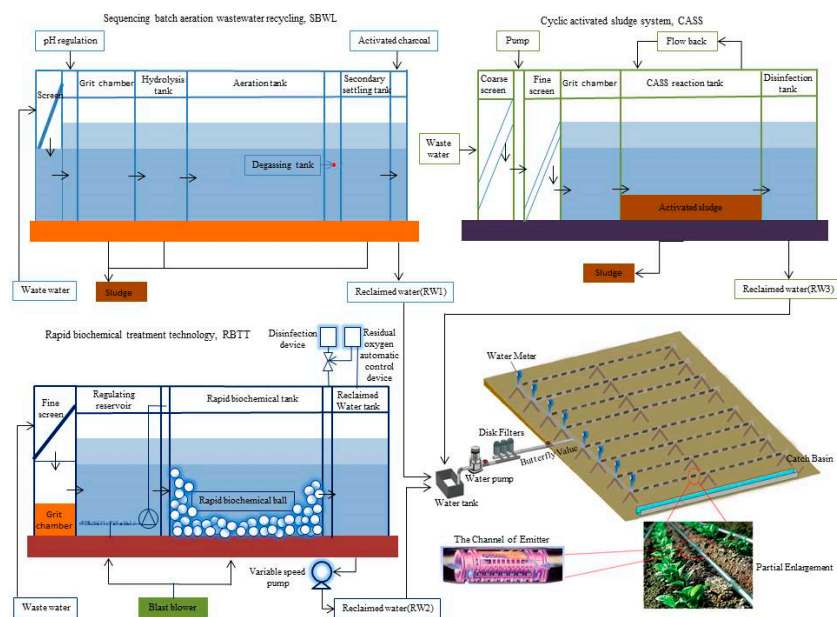

**Figure S1.** Schematic diagram of three sewage treatment processes and reclaimed water agricultural micro-irrigation system.

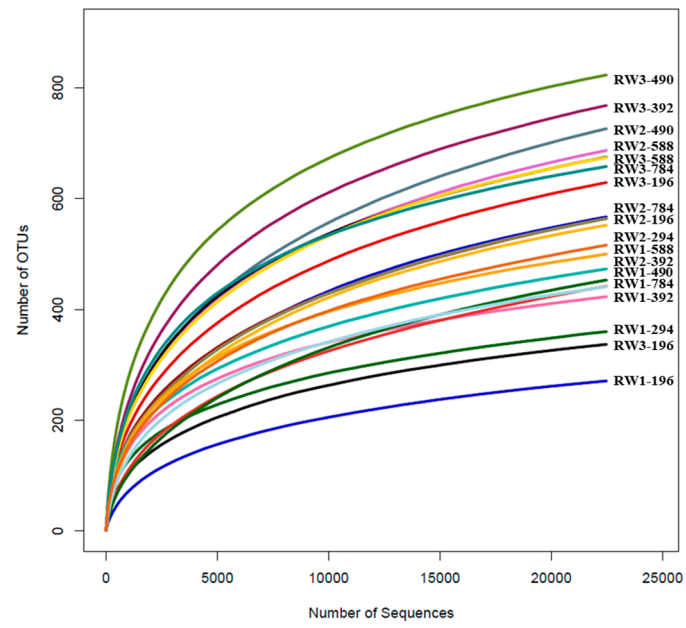

**Figure S2.** Rarefaction curve

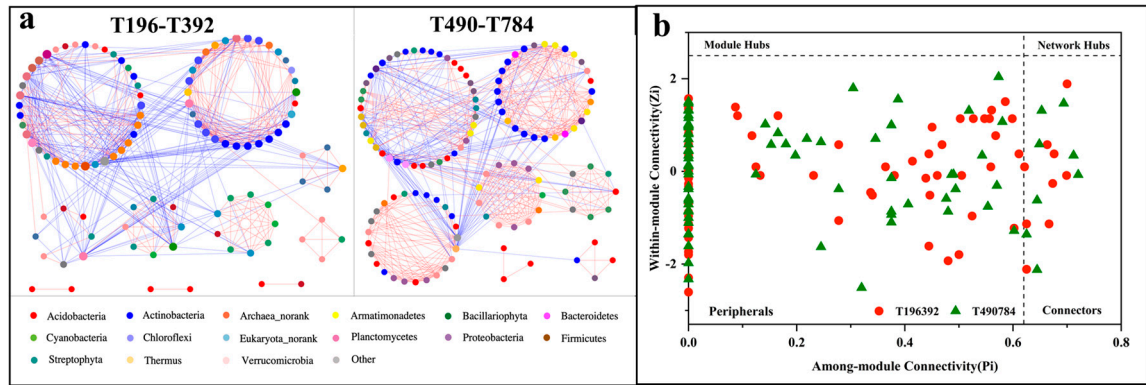

**Figure S3.** Interaction of bacterial networks in biofilms. (a) Visible co-occurrence networks of microorganisms in biofilms formed during T196-T392 and T490-T784, respectively. Red links indicate negative connections and blue links indicate positive connections between the OTUs; (e) Zi-Pi plots based on the topologic roles under different time conditions.

**Table S1** Water quality indexes (mg/L)

| Water quality index                                               | RW1                        | RW2                        | RW3                         |
|-------------------------------------------------------------------|----------------------------|----------------------------|-----------------------------|
| Total number of bacteria<br>(cells×ml <sup>-1</sup> )             | (8.2~9.5) ×10 <sup>4</sup> | (1.4~3.8) ×10 <sup>4</sup> | (9.3~15.8) ×10 <sup>4</sup> |
| COD <sub>Cr</sub>                                                 | 54.5~60.8                  | 36.9~45.2                  | 51.2~59.6                   |
| BOD <sub>5</sub>                                                  | 10.9~16.3                  | 5.8~8.7                    | 12.8~20.9                   |
| Total Nitrogen (TN)                                               | 22.8~28.5                  | 20.7~24.7                  | 24.9~32.1                   |
| Total Phosphorus (TP)                                             | 2.62~4.02                  | 0.28~2.57                  | 3.77~4.15                   |
| Suspended Substance (SS)                                          | 21.2~26.9                  | 13.4~15.7                  | 19.2~23.5                   |
| Total Hardness (TH)                                               | 280.3~320.9                | 153.5~195.8                | 73.1~92.4                   |
| pH                                                                | 7.8~8.3                    | 7.3~8.6                    | 7.4~8.8                     |
| CO <sub>3</sub> <sup>2-</sup> +HCO <sub>3</sub> <sup>-</sup> (TC) | 166~260                    | 190~274                    | 287~387                     |
| Cl <sup>-</sup>                                                   | 106~125                    | 100~115                    | 50.3~66                     |
| SO <sub>4</sub> <sup>2-</sup>                                     | 91.1~109.5                 | 85~98                      | 101~119                     |
| NO <sub>3</sub> <sup>-</sup>                                      | 1.61~3.25                  | 0.27~2.45                  | 3.25~3.64                   |
| Ca <sup>2+</sup>                                                  | 45.8~67.5                  | 37.6~50.6                  | 12.1~18.3                   |
| Mg <sup>+</sup>                                                   | 15.9~26.0                  | 13.4~20.5                  | 8.87~15.2                   |
| Fe <sup>3+</sup>                                                  | 0.02~0.98                  | 0.07~0.25                  | 0.02~0.28                   |
| Mn <sup>2+</sup>                                                  | 0.028~0.019                | <0.001                     | <0.001                      |

**Table S2.** The relative abundances and standard errors of bacteria in phylum, class, order, family and genus (%) (490h).

| Phylum              |            | Chroococcaceae     |           |
|---------------------|------------|--------------------|-----------|
| Acidobacteria       | 1.28±0.35  | Comamonadaceae     | 2.62±0.89 |
| Actinobacteria      | 11.48±1.33 | Erythrobacteraceae | 1.72±0.20 |
| Bacteroidetes       | 1.32±0.20  | Flavobacteriaceae  | 0.60±0.14 |
| Chloroflexi         | 2.08±0.73  | Leptolyngbyaceae   | 0.67±0.35 |
| Cyanobacteria       | 4.67±1.98  | Methylophilaceae   | 0.58±0.22 |
| Firmicutes          | 0.83±0.19  | Microbacteriaceae  | 9.10±1.22 |
| Proteobacteria      | 13.93±1.42 | Moraxellaceae      | 0.46±0.24 |
| Class               |            | Nocardiaceae       |           |
| Actinobacteria      | 11.36±1.34 | Planococcaceae     | 0.55±0.18 |
| Alphaproteobacteria | 8.18±0.76  | Pseudanabaenaceae  | 1.33±0.77 |
| Betaproteobacteria  | 3.69±0.93  | Sphingomonadaceae  | 2.87±0.37 |
| Acidobacteriia      | 0.31±0.09  | Genus              |           |
| Flavobacteriia      | 0.63±0.13  | Acinetobacter      | 0.46±0.24 |
| Gammaproteobacteria | 1.72±0.20  | Altererythrobacter | 1.72±0.20 |
| Bacilli             | 0.79±0.19  | Rhodococcus        | 1.22±0.37 |
| Cytophagia          | 0.21±0.09  | Chroococcus        | 0.44±0.34 |
| Order               |            | Flavobacterium     | 0.43±0.11 |
| Burkholderiales     | 3.03±0.90  | Hydrogenophaga     | 1.94±0.85 |
| Flavobacteriales    | 0.60±0.14  | Leptolyngbya       | 0.60±0.31 |
| Micrococcales       | 9.20±1.23  | Leucobacter        | 0.68±0.13 |
| Pseudomonadales     | 0.79±0.24  | Methylophilus      | 0.58±0.22 |
| Rhizobiales         | 0.99±0.17  | Microbacterium     | 6.42±0.95 |
| Sphingomonadales    | 4.59±0.46  | Phreatobacter      | 0.41±0.08 |
| Synechococcales     | 2.09±1.01  | Pseudomonas        | 0.33±0.08 |
| Corynebacteriales   | 1.63±0.42  | Sphingomonas       | 2.09±0.30 |
| Oscillatoriales     | 1.66±0.81  | Sphingopyxis       | 0.58±0.20 |
| Family              |            | Yonghaparkia       | 1.19±0.37 |
| Bradyrhizobiaceae   | 0.43±0.13  |                    |           |

**Table S3.** Microbial community molecular ecological network topology parameters.

| Treatment | Similarity threshold (St) | Network size (n) | R <sup>2</sup> of power law | Average connectivity (avgK) | Average clustering coefficient (avgCC) | Average path distance (GD) | Modularity | Module No. |
|-----------|---------------------------|------------------|-----------------------------|-----------------------------|----------------------------------------|----------------------------|------------|------------|
| T196-T392 | 0.830                     | 108              | 0.325                       | 12.241                      | 0.395                                  | 2.675                      | 0.388      | 10         |
| T490-T784 | 0.830                     | 123              | 0.294                       | 10.862                      | 0.472                                  | 2.900                      | 0.525      | 7          |
